# Supplementary material for: Navigation performance in glaucoma: virtual-reality-based assessment of path integration
Source: PubMed Central journal article supplement (PMC11393326; doi:10.1038/s41598-024-72040-8), 2024-09-12
Supplement: 41598_2024_72040_MOESM1_ESM.pdf [file 41598_2024_72040_MOESM1_ESM.pdf]

## Supplementary Materials

| Participant     | Age[y] | Sex | Visual Acuity<br>Decimal |      | Visual Acuity<br>logMAR |      | Visual Field<br>MD [dB] |        | pRNFL<br>[ $\mu$ m] |     |
|-----------------|--------|-----|--------------------------|------|-------------------------|------|-------------------------|--------|---------------------|-----|
|                 |        |     | OD                       | OS   | OD                      | OS   | OD                      | OS     | OD                  | OS  |
| <b>Control</b>  |        |     |                          |      |                         |      |                         |        |                     |     |
| C01             | 42     | f   | 1.60                     | 2.00 | -0.2                    | -0.3 | 0.07                    | 0.67   | 97                  | 102 |
| C02             | 59     | m   | 2.00                     | 2.00 | -0.3                    | -0.3 | 0.62                    | -0.08  | 100                 | 98  |
| C03             | 42     | f   | 2.00                     | 2.00 | -0.3                    | -0.3 | 0.12                    | 0.27   | 104                 | 107 |
| C04             | 49     | m   | 1.25                     | 1.00 | -0.1                    | 0.0  | -0.70                   | -0.78  | 88                  | 93  |
| C05             | 66     | f   | 1.00                     | 1.25 | 0.0                     | -0.1 | -0.90                   | -0.48  | 91                  | 95  |
| C06             | 46     | f   | 1.00                     | 1.25 | 0.0                     | -0.1 | 0.74                    | 0.49   | 105                 | 100 |
| C07             | 44     | f   | 1.25                     | 1.25 | -0.1                    | -0.1 | -0.37                   | -1.08  | 98                  | 93  |
| C08             | 46     | m   | 1.60                     | 1.60 | -0.2                    | -0.2 | 0.10                    | 0.64   | 92                  | 92  |
| C09             | 64     | m   | 1.60                     | 1.60 | -0.2                    | -0.2 | 0.81                    | -0.04  | 82                  | 83  |
| C10             | 53     | m   | 1.60                     | 1.60 | -0.2                    | -0.2 | 1.09                    | 0.75   | 106                 | 109 |
| C11             | 42     | f   | 1.25                     | 1.25 | -0.1                    | -0.1 | 0.43                    | 0.33   | 95                  | 96  |
| C12             | 63     | f   | 1.25                     | 1.25 | -0.1                    | -0.1 | -0.03                   | -0.47  | 111                 | 114 |
| C13             | 64     | m   | 1.25                     | 1.60 | -0.1                    | -0.2 | 1.18                    | 2.05   | 93                  | 94  |
| C14             | 73     | m   | 1.00                     | 1.25 | 0.0                     | -0.1 | -0.05                   | -0.92  | 84                  | 92  |
| C15             | 78     | f   | 1.00                     | 1.25 | 0.0                     | -0.1 | 0.59                    | -0.58  | 94                  | 76  |
| <b>Glaucoma</b> |        |     |                          |      |                         |      |                         |        |                     |     |
| G01             | 56     | m   | NA                       | 0.63 | NA                      | 0.2  | NA                      | -31.22 | NA                  | 37  |
| G02             | 64     | m   | NA                       | NA   | NA                      | NA   | -29.99                  | NA     | 56                  | NA  |
| G03             | 51     | f   | 0.03                     | NA   | 1.6                     | NA   | -32.56                  | NA     | 28                  | NA  |
| G04             | 53     | m   | 1.25                     | 1.25 | -0.1                    | -0.1 | 0.12                    | -9.63  | 98                  | 74  |
| G05             | 68     | m   | 1.00                     | 0.80 | 0.0                     | 0.1  | -7.19                   | -0.44  | 79                  | 80  |
| G06             | 61     | f   | 1.25                     | 1.25 | -0.1                    | -0.1 | -1.55                   | -3.25  | 94                  | 97  |
| G07             | 60     | m   | 1.60                     | 1.25 | -0.2                    | -0.1 | -1.38                   | -3.38  | 89                  | 78  |
| G08             | 62     | f   | 1.25                     | 1.25 | -0.1                    | -0.1 | 0.93                    | 0.27   | 96                  | 94  |
| G09             | 74     | f   | 0.63                     | 0.80 | 0.2                     | 0.1  | -2.98                   | -5.00  | 84                  | 77  |
| G10             | 66     | m   | 1.60                     | 1.25 | -0.2                    | -0.1 | -0.45                   | -1.18  | 78                  | 66  |
| G11             | 80     | f   | 0.63                     | 0.80 | 0.2                     | 0.1  | -17.86                  | -3.51  | 57                  | 80  |
| G12             | 52     | f   | 1.00                     | 1.00 | 0.0                     | 0.0  | -1.88                   | -1.22  | 106                 | 105 |
| G13             | 60     | f   | 1.25                     | 1.00 | -0.1                    | 0.0  | -0.33                   | -6.44  | 83                  | 75  |
| G14             | 79     | m   | 0.32                     | 0.63 | 0.5                     | 0.2  | -0.10                   | -16.12 | 80                  | 44  |

**Age[y]**, Age in Years; **OD**, Right Eye; **OS**, Left Eye  
**MD**, Mean Deviation; **pRNFL**, Peripapillary Retinal Nerve Fiber Layer  
**f**, female; **m**, male; **NA**, Not Available

**Supplementary Table 1.** Summary of participant visual characteristics
